# Supplementary material
Source: ML conference proceedings conference paper supplement (https://openaccess.thecvf.com/content/ICCV2023/html/Nam_Cyclic_Test-Time_Adaptation_ICCV_2023_paper.html)
Supplement: Supplementary file 3 [file Nam_Cyclic_Test-Time_Adaptation_ICCV_2023_supplemental.zip]

Archive with 4 entries (4 files):
- CycleAdapt.mp4
- __MACOSX/._CycleAdapt.mp4
- 06754-supp.pdf
- __MACOSX/._06754-supp.pdf
